# Supplementary material for: Stability and kinetics of the acid-promoted decomposition of tertiary binuclear CuII2LXz+ complexes (L = octaaza cryptand, X = SCN−, N3− and 2 NH3): the ancillary ligand modulates the kinetics of dissociation of the cryptand
Source: Royal Society of Chemistry journal article supplement (doi:10.1039/b111573c), 2002-01-01
Supplement: b111573c.doc [file b111573c.doc]

#### Stability and Kinetics of the Acid-Promoted Decomposition of Tertiary Binuclear CuII2LXz+ Complexes (L= Octaaza Cryptand, X= SCN-, N3- and 2 NH3): The Ancillary Ligand modulates the Kinetics of Dissociation of the Cryptand.

**Manuel G. Basallote,* Joaquín Durán, M. Jesús Fernández-Trujillo and M. Angeles Máñez**

Departamento de Ciencia de los Materiales e Ingeniería Metalúrgica y Química Inorgánica, Universidad de Cádiz, Facultad de Ciencias, Apartado 40, Puerto Real, 11510 Cádiz, Spain

##### SUPPLEMENTARY MATERIAL

# Summary

Solution studies indicate that the Cu2L(OH)3+ complex, where L is a large octaaza cryptand, reacts with NH3, KSCN and NaN3 to form the binuclear tertiary complexes Cu2L(NH3)24+, Cu2L(SCN)3+ and Cu2L(N3)3+. The equilibrium constants show a special stabilisation of the complexes with ligands able to bridge the CuII centres, with a maximum stabilisation for azide. Upon addition of an excess of acid, all the complexes decompose with release of Cu2+ and the protonated ligands. The kinetics of the acid-promoted decomposition has been studied under pseudo-first order conditions of acid excess. The decomposition of the OH-, SCN- and NH3 complexes is first order with respect to H+, although with a clear tendency to saturation, and the values of the rate constants depend on the nature of the ancillary ligand. In contrast, Cu2L(N3)3+ decomposes with a second order dependence on the acid concentration. These results are interpreted in terms of modifications induced by the ancillary ligand in the kinetics of acid-assisted dissociation of the Cu-N(cryptate) bonds. Depending on the steric requirements of the ancillary ligand, the Cu-N(cryptate) bonds are strained at different degrees and the more distorted complexes decompose faster. In the case of azide, there is an optimum fit between the ancillary ligand and the Cu2L4+ site that causes a change in the rate-determining step from dissociation of the first Cu-N bond to the second one.

Table S1.- Kinetic data for the decomposition of binuclear CuII2LXz+ complexes upon addition of an excess of acid (25.0ºC, 0.10 mol dm-3 KNO3). a

| X | [X]0/mol dm-3 | 102 [HNO3]0/ mol dm-3 | 102 [H+]/ mol dm-3 | *k*obs/ s-1 |
| --- | --- | --- | --- | --- |
| SCN- | 7.510-3 | 0.25 | 0.25 | 0.33 |
|  |  | 0.50 | 0.50 | 1.13 |
|  |  | 0.98 | 0.98 | 2.76 |
|  |  | 1.95 | 1.95 | 5.35 |
|  |  | 2.93 | 2.93 | 7.24 |
|  |  | 3.90 | 3.90 | 8.69 |
|  |  | 4.88 | 4.88 | 9.56 |
|  | 4.2510-3 | 0.25 | 0.25 | 0.35 |
|  |  | 0.50 | 0.50 | 1.25 |
|  |  | 0.98 | 0.98 | 2.81 |
|  |  | 1.95 | 1.95 | 5.32 |
|  |  | 2.93 | 2.93 | 6.89 |
|  |  | 3.90 | 3.90 | 8.54 |
|  |  | 4.88 | 4.88 | 9.17 |
|  |  |  |  |  |
| N3- | 7.5010-4 | 0.25 | 0.18 | 0.0035 |
|  |  | 0.50 | 0.43 | 0.0102 |
|  |  | 0.98 | 0.91 | 0.0491 |
|  |  | 1.95 | 1.88 | 0.385 |
|  |  | 2.93 | 2.86 | 1.18 |
|  |  | 3.90 | 3.83 | 2.33 |
|  |  | 4.88 | 4.81 | 3.97 |
|  | 2.2510-3 | 0.25 | 0.04 | 0.0015 |
|  |  | 0.50 | 0.28 | 0.0043 |
|  |  | 0.98 | 0.76 | 0.0281 |
|  |  | 1.95 | 1.73 | 0.258 |
|  |  | 2.93 | 2.71 | 0.825 |
|  |  | 3.90 | 3.68 | 1.74 |
|  |  | 4.88 | 4.66 | 3.08 |
|  |  |  |  |  |
| NH3 | 4.2210-3 | 0.98 | 0.57 | 0.74 |
|  |  | 1.95 | 1.54 | 1.66 |
|  |  | 2.93 | 2.52 | 2.32 |
|  |  | 3.90 | 3.48 | 2.88 |
|  |  | 4.88 | 4.46 | 3.17 |
|  | 2.7010-3 | 0.98 | 0.72 | 0.71 |
|  |  | 1.95 | 1.69 | 1.71 |
|  |  | 2.93 | 2.67 | 2.36 |
|  |  | 3.90 | 3.64 | 2.77 |
|  |  | 4.88 | 4.62 | 3.16 |

a The starting solutions of the complexes contained CuII and L in 2:1 molar ratio ([L]0= 3.7510-5 mol dm-3) and X (SCN-, N3- or NH3) at the concentration indicated in the second column; the starting pH was adjusted to 7.05 with titrated KOH and HNO3 solutions. The table includes the concentration of acid added in every experiment ([HNO3]0) and the concentration of H+ available for decomposition of the metal complexes ([H+]). Both concentrations coincide for X= SCN- but they differ for N3- and NH3. Details about the calculation are given in Appendix A.

**Appendix A**

In the kinetic experiments of decomposition of the NH3 and N3- complexes, the concentration of acid available for decomposition of the metal complex ([H+]) differs from the added concentration ([H+]0) because some acid is used to neutralise the excess of NH3 or N3-.

As any excess of NH3 will be completely converted to NH4+ upon addition of the large excess of acid used in the kinetic experiments, the values of [H+] can be easily calculated with eq 1S.

[H+]= [H+]0 – ([NH3]0-2[L]0) (1S)

In the decomposition of the Cu2L(N3)3+ complex, the azide ion is not completely protonated under the experimental conditions used and the equilibrium constant for eq 2S (log *K*HN3= 4.45) 15 must be used to calculate [H+].

N3- + H+ HN3 (2S)

Consideration of the equilibrium in eq 2S and balancing the total amounts of acid and azide ion (eqs 3S-4S) leads to eq 5S, which can be solved to obtain the concentration of acid available for reaction with the Cu2L(N3)3+ complex.

[N3-]+ [HN3] + [Cu2L(N3)3+]0 = [N3-]0 (3S)

[H+] + [HN3] = [H+]0 (4S)

*K*HN3 [H+]2 + {1 + *K*HN3 ([N3-]0 - [Cu2L(N3)3+]0 - [H+]0)} [H+] - [H+]0 = 0 (5S)

The values of [H+] calculated with eqs 1S and 5S for the different conditions used in the kinetic experiments are included in Table S1.
